# Supplementary material for: Two unrelated Pseudomonas aeruginosa phages require the exopolysaccharide Psl for infection
Source: Research Square preprint supplement (doi:10.21203/rs.3.rs-6623495/v1), 2025-06-02
Supplement: Supplementary file 1 [file 291cfce8117cc0b3a543de25.pdf]

## SUPPLEMENTAL INFORMATION

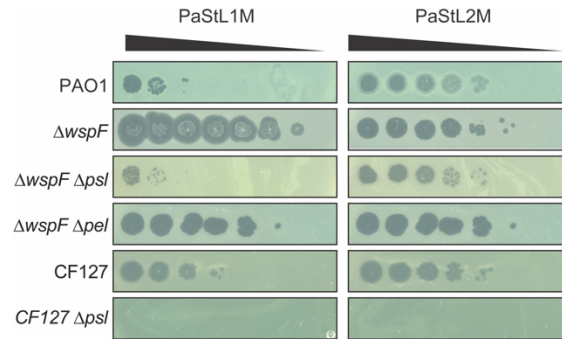

**Fig S1. Phages display different abilities to form plaques on different bacterial strains.**

Phage plaques of two phage stocks, PaStL1M and PaStL2M, on a panel of PAO1 and CF127 bacterial strains. Serial dilutions of the indicated phage stocks were spotted on plates made with the indicated bacterial strain.

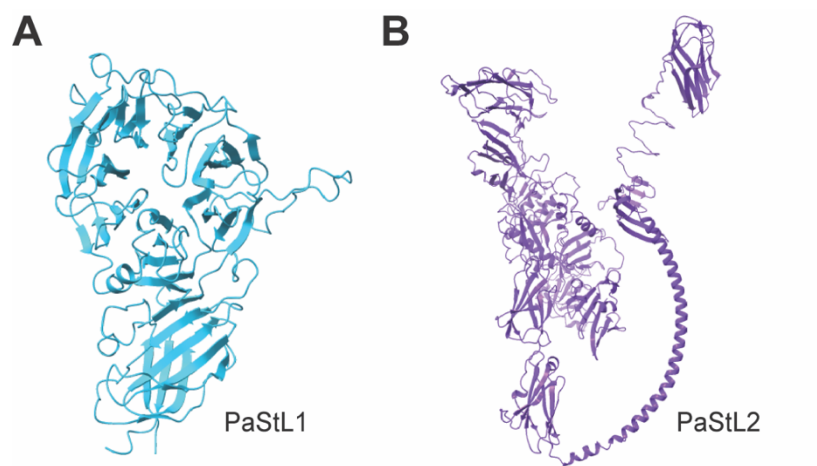

**Fig S2. AlphaFold predicted structures of putative depolymerases from (A) PaStL1 and (B) PaStL2.**

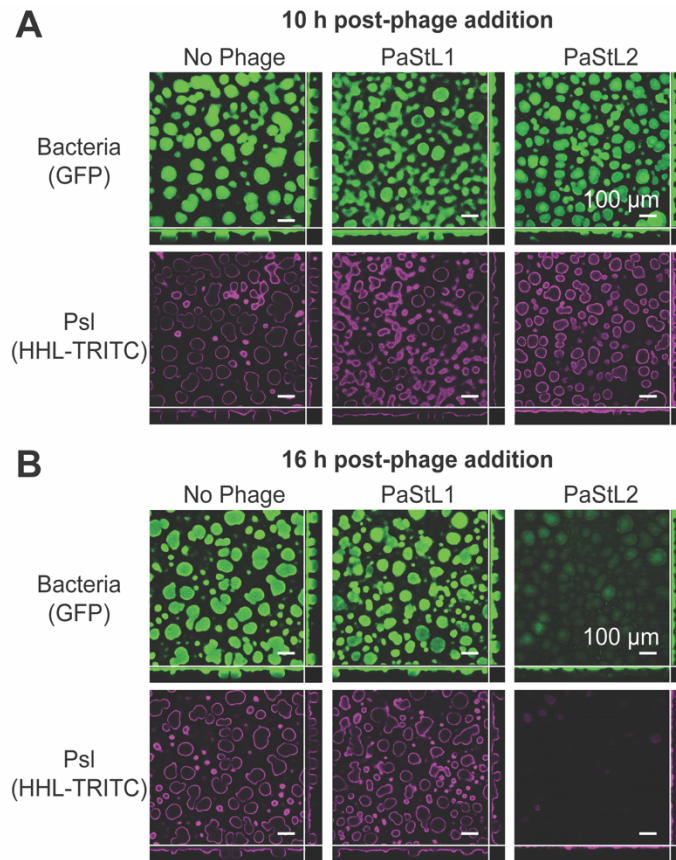

**Fig S3. PaStL2 clears mature flow cell biofilms.** Phages were added to mature flow cell biofilms of PAO1  $\Delta wspF$  GFP<sup>+</sup>, and (A) 10 h or (B) 16 h post-phage addition, confocal microscopy images of the biofilms were collected to determine whether the phages cleared the biofilms. Fluorescence due to GFP (bacteria) is shown in green, and HHL-TRITC (Psl) is shown in magenta. Typical images for each time point are shown.

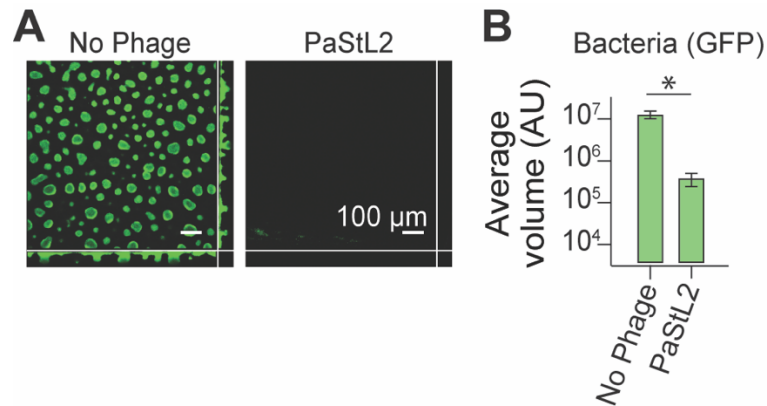

**Fig S4. PaStL2 also clears wild-type PAO1 flow cell biofilms.** (A) Phages were added to mature flow cell biofilms of PAO1 GFP<sup>+</sup>, and confocal microscopy images of the biofilms were collected 26 h. Fluorescence due to GFP (bacteria) is shown in green. Typical images are shown. (B) The volume of bacteria in the flow cells 26 h post-phage addition was determined using BiofilmQ and compared to the volume of bacteria in the no-phage control. Data represent the means of results from 3 biological replicates (3 flow cells with 6 images collected per flow cell), and error bars represent standard deviation. Welch's *t*-test;  $P < 0.005$ .

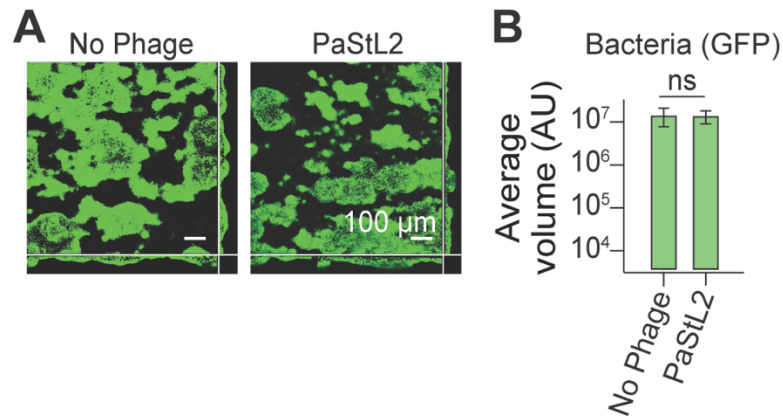

**Fig S5. PaStL2 does not clear PAO1  $\Delta wspF \Delta psI$  flow cell biofilms.** (A) Phages were added to mature flow cell biofilms of PAO1  $\Delta wspF \Delta psI$  GFP<sup>+</sup>, and confocal microscopy images of the biofilms were collected 26 h. Fluorescence due to GFP (bacteria) is shown in green. Typical images are shown. (B) The volume of bacteria in the flow cells 26 h post-phage addition was determined using BiofilmQ and compared to the volume of bacteria in the no-phage control. Data represent the means of results from 3 biological replicates (3 flow cells with 6 images collected per flow cell), and error bars represent standard deviation. Welch's *t*-test;  $P < 0.005$ , n.s., not statistically significant.

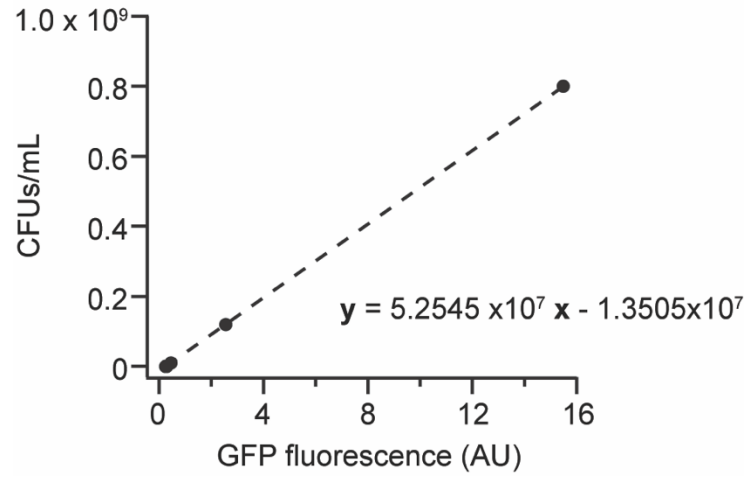

**Fig S6. Standard curve of CFUs/mL to GFP fluorescence of planktonic PAO1  $\Delta wspF$  GFP<sup>+</sup> bacteria.**

**Table S1.**

| <b><i>P. aeruginosa</i> strains</b>                  |                                                                                                                                                                         | <b>Reference</b> |
|------------------------------------------------------|-------------------------------------------------------------------------------------------------------------------------------------------------------------------------|------------------|
| PAO1                                                 | Wild type                                                                                                                                                               | Holloway, 1955   |
| PAO1 $\Delta wspF$                                   | <i>wspF</i> , nonpolar mutation                                                                                                                                         | Borlee, 2010     |
| PAO1 $\Delta wspF \Delta psI$                        | <i>wspF</i> , nonpolar mutation; <i>psI/BCD</i> polar mutant of <i>psI</i> operon                                                                                       | Jennings, 2015   |
| PAO1 $\Delta wspF \Delta pel$                        | <i>wspF</i> , nonpolar mutation; <i>pelA</i> , polar mutant of the <i>pel</i> operon                                                                                    | Jennings, 2015   |
| PAO1 $\Delta wspF \Delta psI \Delta pel$             | <i>wspF</i> , nonpolar mutation; <i>psI/BCD</i> polar mutant of <i>psI</i> operon; <i>pelA</i> , polar mutant of the <i>pel</i> operon                                  | Colvin, 2013     |
| PAO1 $\Delta wspF \Delta psI \Delta pel \Delta algD$ | <i>wspF</i> , nonpolar mutation; <i>psI/BCD</i> , polar mutant of <i>psI</i> operon; <i>pelA</i> , polar mutant of the <i>pel</i> operon; <i>algD</i> nonpolar mutation | Reichhardt, 2018 |
| CF127                                                | Cystic fibrosis isolate                                                                                                                                                 | Wolfgang, 2003   |
| CF127 $\Delta psI$                                   | <i>psI/D</i> , non-polar mutant of the <i>psI</i> operon                                                                                                                | Colvin, 2011     |
| PAO1 $\Delta wspF \Delta pel$<br>pBAD <i>psI</i>     | Arabinose-inducible <i>psI</i> operon                                                                                                                                   | Jennings, 2015   |

**Table S2. Additional mutations in  $\Delta$ wspF-PaStL2E-f**

Additional mutations that were identified in one of the escape mutants, present in >60% of reads

| Protein                    | locus tag | AA change       | Protein Effect |
|----------------------------|-----------|-----------------|----------------|
| <i>tssK1</i>               | PA0079    | A278S;<br>L388F | substitution   |
| <i>CynX/NimT family</i>    |           |                 |                |
| <i>MFS transporter</i>     | PA0273    | G147C           | substitution   |
| <i>batD family protein</i> | PA3075    | A396E           | substitution   |
| hypothetical protein       | PA3684    | S67I            | substitution   |
| <i>wspR</i>                | PA3702    |                 | frameshift     |
|                            |           | D150E;          |                |
| <i>pchG</i>                | PA4224    | G137C           | substitution   |
| <i>ureF</i>                | PA4892    | A136S           | substitution   |
| <i>dguA</i>                | PA5084    | G376V           | substitution   |
